# Supplementary material
Source: MDPI journal article supplement (https://www.mdpi.com/2313-433X/8/2/46)
Supplement: s1 [file s1]

# Supplementary Materials—Refining Tumor Treatment in Sinonasal Cancer Using Delta Radiomics of Multi-Parametric MRI after the First Cycle of Induction Chemotherapy

Valentina D. A. Corino \*, Marco Bologna, Giuseppina Calareso, Carlo Resteghini, Silvana Sdao, Ester Orlandi, Lisa Licitra, Luca Mainardi and Paolo Bossi

**Table S1.** Scanners and acquisition parameters used to acquire the magnetic resonance images.

|                                     |                                                                                                                                                                                                                                                                                                                                                 |
|-------------------------------------|-------------------------------------------------------------------------------------------------------------------------------------------------------------------------------------------------------------------------------------------------------------------------------------------------------------------------------------------------|
| <b>Scanner</b>                      | <ul style="list-style-type: none"> <li>- GE Discovery MR 750 3T (1 patient)</li> <li>- Philipps Achieva 1.5T (3 patients)</li> <li>- Siemens Magnetom Aera 1.5T (2 patient)</li> <li>- Siemens Magnetom Avanto 1.5T (33 patients)</li> <li>- Siemens Magnetom Avanto Fit 1.5T (10 patients)</li> <li>- Toshiba MRT200PP3 (1 patient)</li> </ul> |
| <b>Pulse sequence</b>               | <ul style="list-style-type: none"> <li>- Turbo spin-echo (T1-weighted and T2-weighted)</li> <li>- Echo planar imaging (DWI)</li> </ul>                                                                                                                                                                                                          |
| <b>TR</b>                           | <ul style="list-style-type: none"> <li>- T1-weighted (<math>525.99 \pm 66.29</math> ms, range 405–720 ms)</li> <li>- T2-weighted (<math>4.81 \pm 1.42</math> s, range 2.65–8.81 s)</li> <li>- DWI (<math>5.19 \pm 1.26</math> s, range 2.55–7.4 s)</li> </ul>                                                                                   |
| <b>TE</b>                           | <ul style="list-style-type: none"> <li>- T1-weighted (<math>11.58 \pm 1.27</math> ms, range 5.93–15 ms)</li> <li>- T2-weighted (<math>108.08 \pm 7.66</math> ms, range 75–123 ms)</li> <li>- DWI (<math>76.11 \pm 15.51</math> ms, range 52.5–93 ms)</li> </ul>                                                                                 |
| <b>Diffusion b-values sequences</b> | <ul style="list-style-type: none"> <li>- 0/1000 s/mm<sup>2</sup> (3 patients)</li> <li>- 0/50/100/500/750/1000 s/mm<sup>2</sup> (25 patients)</li> <li>- 0/10/20/50/70/150/200/500/1000 s/mm<sup>2</sup> (6 patients)</li> </ul>                                                                                                                |
| <b>Slice thickness</b>              | <ul style="list-style-type: none"> <li>- T1-weighted (<math>3.15 \pm 0.48</math> mm, range 3–5 mm)</li> <li>- T2-weighted (<math>3.12 \pm 0.40</math> mm, range 3–5 mm)</li> <li>- DWI (<math>3.13 \pm 0.45</math> mm, range 3–5 mm)</li> </ul>                                                                                                 |
| <b>Pixel spacing</b>                | <ul style="list-style-type: none"> <li>- T1-weighted (<math>0.60 \pm 0.10</math> mm, range 0.25–0.9 mm)</li> <li>- T2-weighted (<math>0.50 \pm 0.10</math> mm, range 0.29–0.69 mm)</li> <li>- DWI (<math>1.58 \pm 0.41</math> mm, range 0.94–2.18 mm)</li> </ul>                                                                                |

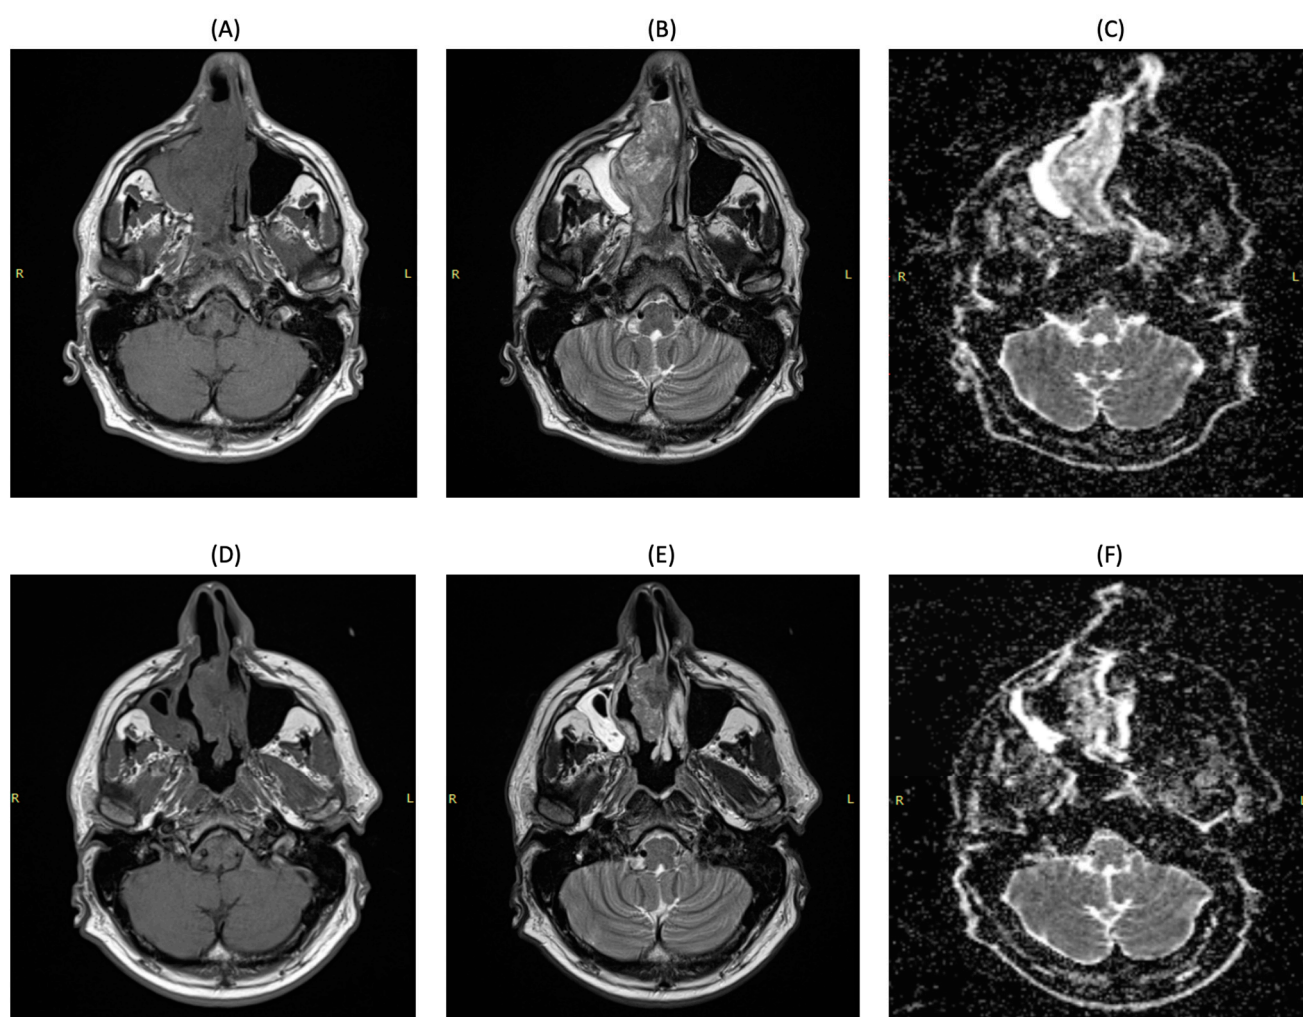

**Figure S1.** T1- and T2-weighted images and ADC map for one patient at baseline (A) – (B) – (C) and after three weeks after starting IC therapy (D) – (E) – (F).
